# Supplementary material for: An Impedimetric Biosensor Based on Ionic Liquid-Modified Graphite Electrodes Developed for microRNA-34a Detection
Source: PubMed Central journal article supplement (PMC6164345; doi:10.3390/s18092868), 2018-08-31
Supplement: sensors-18-02868-s001.pdf [file sensors-18-02868-s001.pdf]

**Impedimetric Biosensor Based on Ionic Liquid Modified Graphite Electrodes Developed for miRNA-34a Detection**

Ece Kesici<sup>1,2</sup>, Ece Eksin<sup>1,2</sup> and Arzum Erdem<sup>1,2,\*</sup>

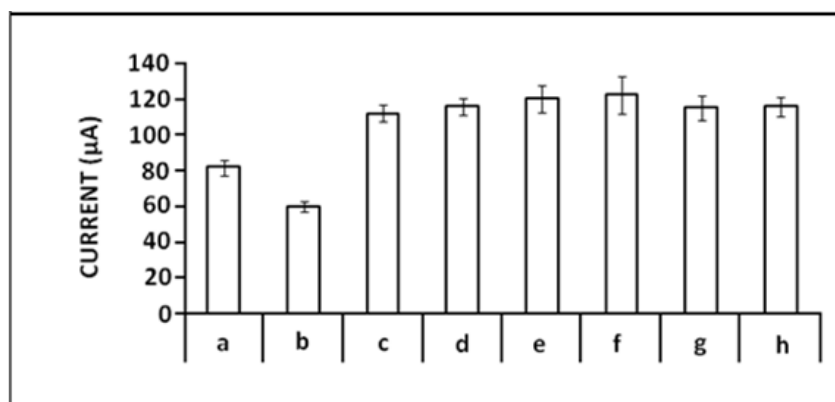

**Fig. S1.** Histograms representing the anodic peak currents ( $I_a$ ) of (a) PGE (b) CA/PGE, %IL modified CA/PGE (c) 5% (d) 10% (e) 15% (f) 20% (g) 25% (h) 30%. The CV measurements were conducted in 2 mM  $K_4[Fe(CN)_6]$  /  $K_3[Fe(CN)_6]$  (1:1) prepared in 0.1 M KCl.

**Table S1.** According to the CV measurements; average anodic peak currents ( $I_a$ ) average cathodic peak current ( $I_c$ ), anodic charge values ( $Q_a$ ) and calculated surface areas ( $A$ ) of PGE, CA/PGE and % IL modified CA/PGEs, 5% to 30%.

|                      | $I_a$ (µA) | $I_c$ (µA) | $Q_a$ | $Q_c$ | $A$ (cm <sup>2</sup> ) | %     |
|----------------------|------------|------------|-------|-------|------------------------|-------|
| <b>PGE</b>           | 81.96      | 88.23      | 1.15  | 1.02  | 0,25 cm <sup>2</sup>   | -     |
| <b>CA/PGE</b>        | 60.01      | 73.23      | 1.08  | 0.93  | 0.18 cm <sup>2</sup>   | -     |
| <b>5% IL/CA/PGE</b>  | 112.10     | 101.23     | 1.39  | 1.29  | 0.34 cm <sup>2</sup>   | 36.99 |
| <b>10% IL/CA/PGE</b> | 116.10     | 103.13     | 1.39  | 1.13  | 0.35 cm <sup>2</sup>   | 42.28 |

|                      |        |        |      |      |                      |       |
|----------------------|--------|--------|------|------|----------------------|-------|
| <b>15% IL/CA/PGE</b> | 120.50 | 104.16 | 1.37 | 1.27 | 0.36 cm <sup>2</sup> | 47.97 |
| <b>20% IL/CA/PGE</b> | 122.33 | 106.98 | 1.43 | 1.30 | 0.37 cm <sup>2</sup> | 50.00 |
| <b>25% IL/CA/PGE</b> | 115.30 | 105.40 | 1.34 | 1.23 | 0.35 cm <sup>2</sup> | 41.05 |
| <b>30% IL/CA/PGE</b> | 116.23 | 99.14  | 1.36 | 1.23 | 0.36 cm <sup>2</sup> | 44.31 |

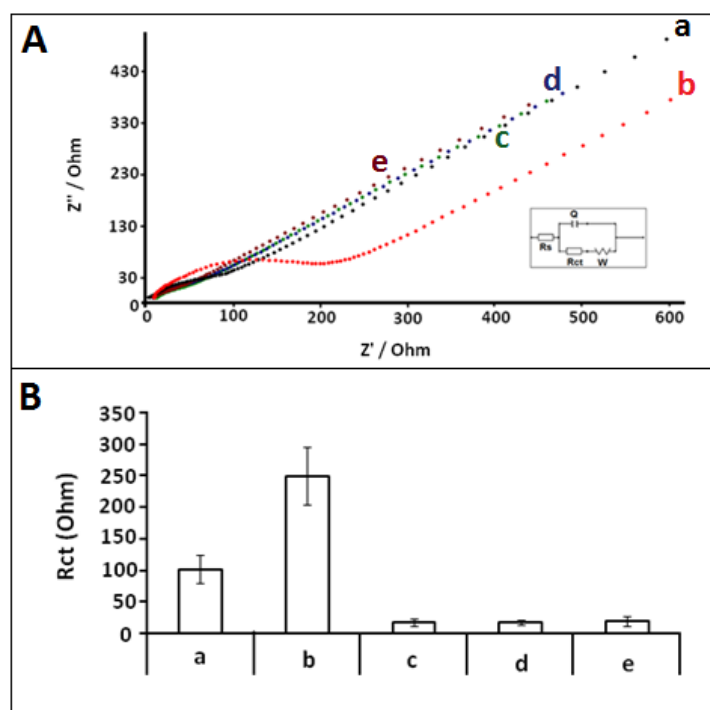

**Fig. S2.** (A) Nyquist diagrams (B) Histograms representing the  $R_{ct}$  values obtained by (a) PGE, (b) CA/PGE, 20% IL modified CA/PGE, (c) 15 min, (d) 30 min, (e) 60 min.

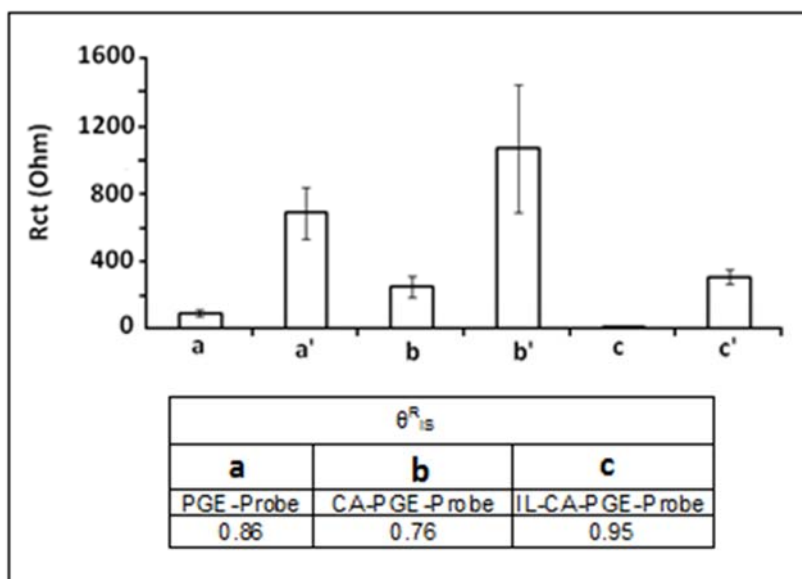

**Fig. S3.** Histograms representing the  $R_{ct}$  values obtained by (a) PGE, (b) CA/PGE, (c) IL/CA/PGE, 1  $\mu\text{g/mL}$  probe modified (a') PGE, (b') CA/PGE, (c') IL/CA/PGE. Inset was the apparent fractional coverage ( $Q_{IS}^R$ ) values of 1  $\mu\text{g/mL}$  miRNA-34a DNA probe modified (a) PGE, (b) CA/PGE, (c) IL/CA/PGE.

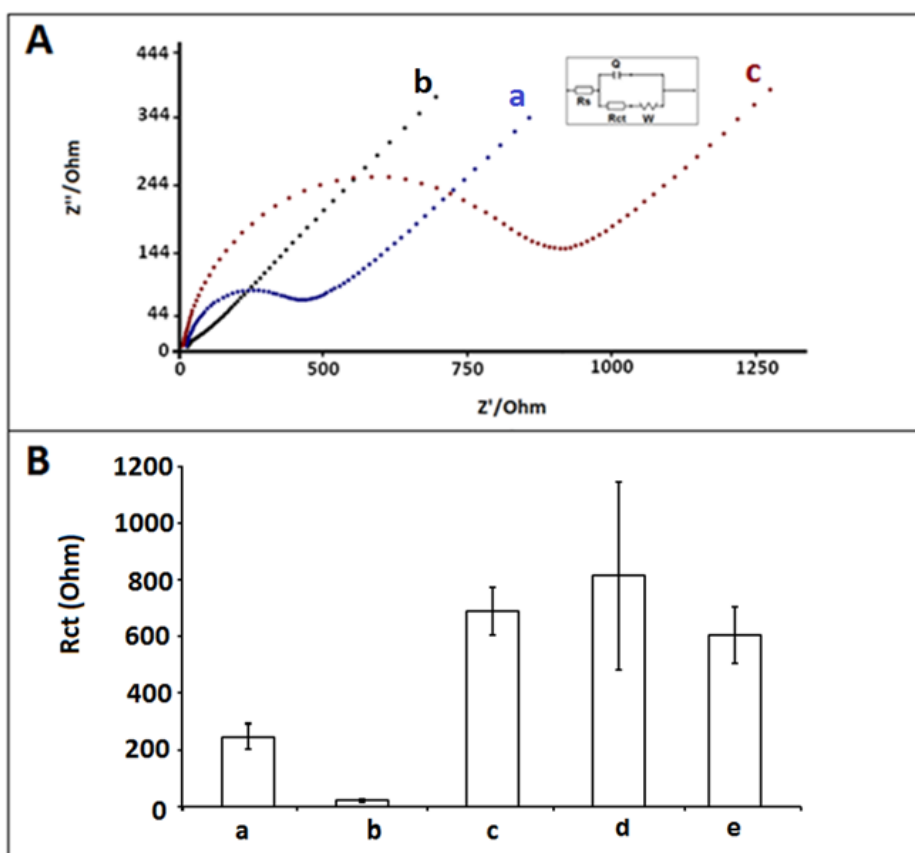

**Fig. S4.** (A) Nyquist diagrams representing the  $R_{ct}$  values obtained by (a) CA/PGE, (b) IL/CA/PGE, (c) Hybrid between  $1\mu\text{g/mL}$  miRNA-34a probe and  $10\mu\text{g/mL}$  target modified IL/CA/PGE. (B) Histograms representing the  $R_{ct}$  values obtained by (a) CA/PGE, (b) IL/CA/PGE, (c) Hybrid between  $1\mu\text{g/mL}$  miRNA-34a probe (d)  $0.5\mu\text{g/mL}$  probe (e)  $1.5\mu\text{g/mL}$  probe and  $10\mu\text{g/mL}$  target modified IL/CA/PGE.

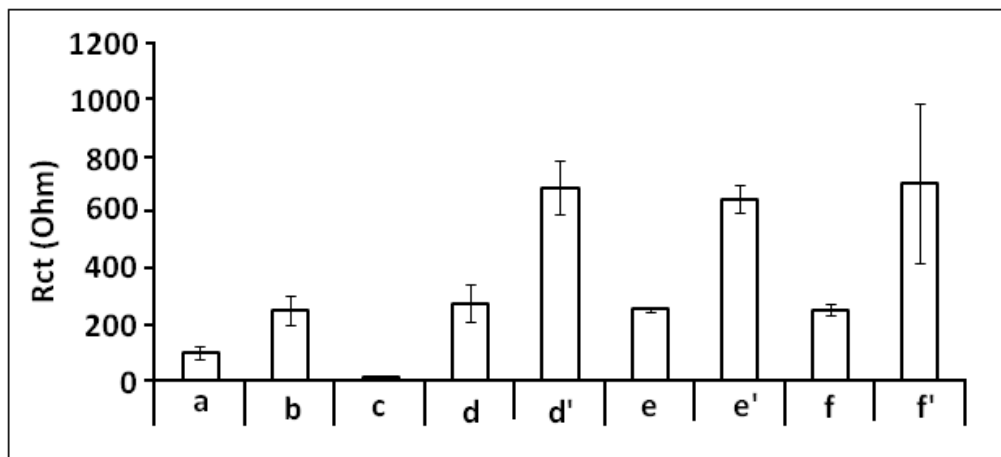

**Fig. S5.** Histograms representing the  $R_{ct}$  values obtained by (a) PGE, (b) CA/PGE, 20% IL modified CA/PGE, pseudo hybridization of  $1\mu\text{g/mL}$  miRNA-34a DNA probe onto the surface of IL/CA/PGE in different time (d) 5 min, (e) 15 min, (f) 30 min, after hybridization between  $1\mu\text{g/mL}$  miRNA-34a DNA probe and  $10\mu\text{g/mL}$  miRNA-34a target immobilization onto the IL/CA/PGE surface in different hybridization time (d') 5 min, (e') 15 min, (f') 30 min.

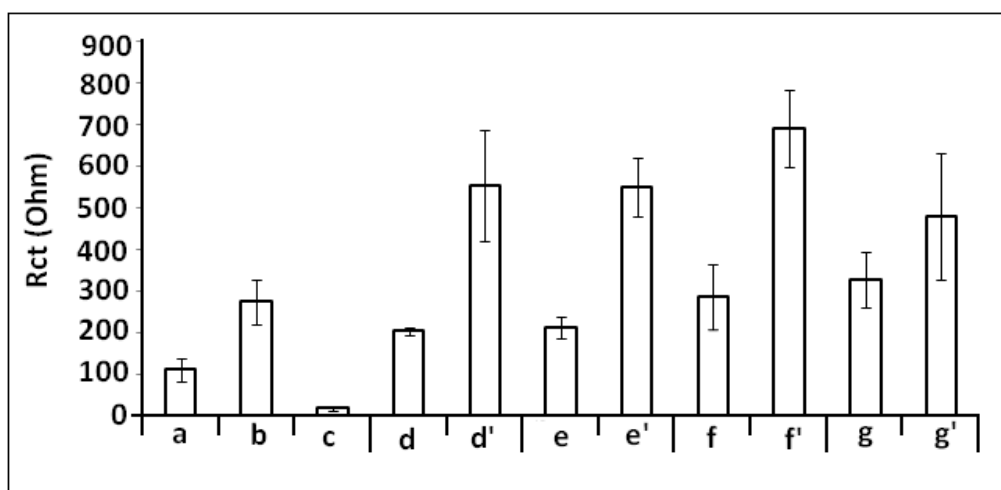

**Fig. S6.** Histograms representing the  $R_{ct}$  values obtained by (a) PGE, (b) CA/PGE, 20% IL modified CA/PGE, pseudo hybridization of  $1\mu\text{g/mL}$  miRNA-34a DNA probe immobilization onto the surface of IL/CA/PGE in various time (d) 5 min, (e) 15 min, (f) 30 min, (g) 45 min, after hybridization between  $1\mu\text{g/mL}$  miRNA-34a DNA probe and  $10\mu\text{g/mL}$  miRNA-34a target immobilization onto the IL/CA/PGE surface in various time (d') 5 min, (e') 15 min, (f') 30 min, (g') 45 min.

**Table S2.** The  $Q_{IS_R}^{IS}$  values obtained using hybrid immobilized IL/CA/PGE at different concentration level of miRNA-34a DNA target from 2 to 12  $\mu\text{g/mL}$ .

| miRNA-34a target concentration ( $\mu\text{g/mL}$ ) | PGE-CA-IL-hybrid $Q_{IS_R}^{IS}$ |
|-----------------------------------------------------|----------------------------------|
| 2                                                   | 0.823                            |
| 4                                                   | 0.906                            |
| 6                                                   | 0.928                            |
| 8                                                   | 0.942                            |
| 10                                                  | 0.955                            |
| 12                                                  | 0.919                            |

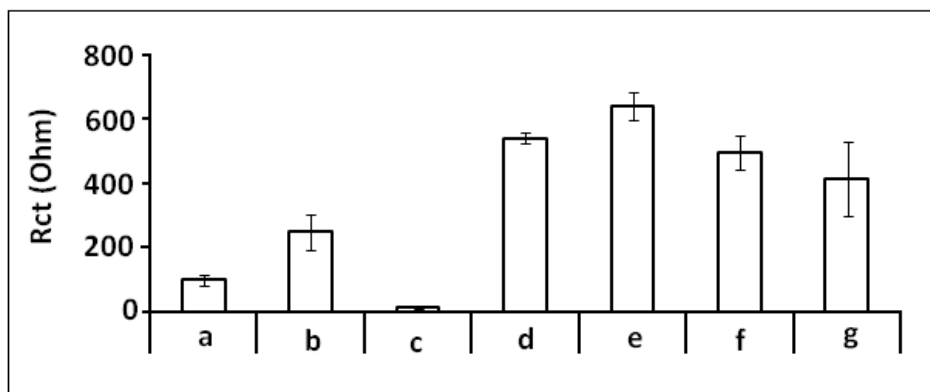

**Fig. S7.** Histograms representing the  $R_{ct}$  values obtained by (a) PGE, (b) CA/PGE, 20% IL modified CA/PGE, pseudo hybridization of 1  $\mu\text{g/mL}$  miRNA-34a DNA probe onto the surface of IL/CA/PGE in different FBS dilution rate (d) 1:1, (e), 1:5, (f) 1:10, (g) 1:20.

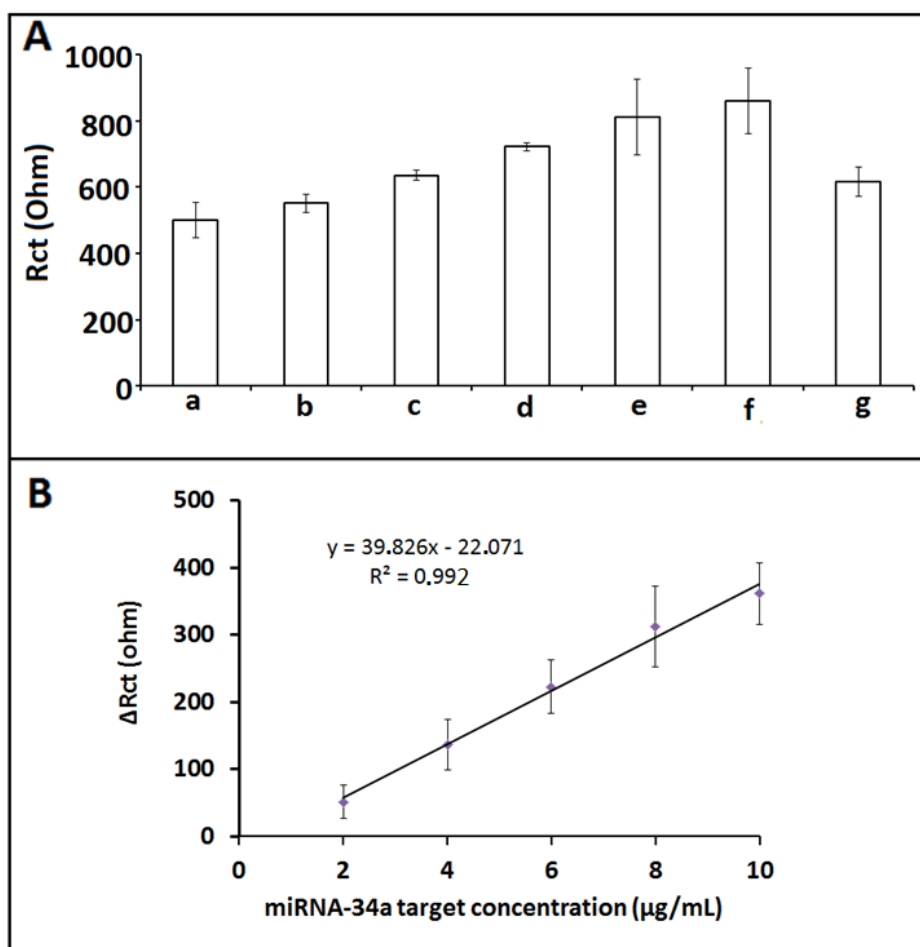

**Fig. S8.**(A) Histograms representing the  $R_{ct}$  values obtained by (a) pseudo hybridization of 1  $\mu\text{g/mL}$  miRNA-34a DNA probe in diluted FBS (1:10), after hybridization between 1  $\mu\text{g/mL}$  miRNA-34a DNA probe and different miRNA-34a target concentrations (b) 2  $\mu\text{g/mL}$ , (c) 4  $\mu\text{g/mL}$ , (d) 6  $\mu\text{g/mL}$  (e) 8  $\mu\text{g/mL}$ , (f) 10  $\mu\text{g/mL}$  (g) 12  $\mu\text{g/mL}$ . (B) The calibration graph obtained from  $R_{ct}$  values measured in the presence of different concentration of miRNA-34a target, ranging from 2-10  $\mu\text{g/mL}$ .
